RESEARCH ARTICLE

# Dietary Fat Intake and Risk of Gastric Cancer: A Meta-Analysis of Observational Studies

Jun Han<sup>1</sup>\*, Yi Jiang<sup>1</sup>\*, Xiao Liu<sup>2</sup>, Qingyang Meng<sup>1</sup>, Qiulei Xi<sup>1</sup>, Qiulin Zhuang<sup>1</sup>, Yusong Han<sup>1</sup>, Ying Gao<sup>3</sup>, Qiurong Ding<sup>3</sup>, Guohao Wu<sup>1</sup>\*

**1** The Clinical Nutrition Center of Shanghai, Department of General Surgery, Zhongshan Hospital of Fudan University, Shanghai, China, **2** Nursing Department, Nanjing Maternity and Child Health Care Hospital Affiliated to Nanjing Medical University, Nanjing, Jiangsu Province, China, **3** Institute for Nutritional Sciences, Shanghai Institutes for Biological Sciences, Chinese Academy of Sciences, Shanghai, China

\* These authors contributed equally to this work.

\* [profwugh@163.com](mailto:profwugh@163.com)

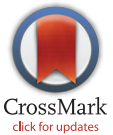

## Abstract

### Background and Objectives

Consumption of dietary fat has been reported to be associated with gastric cancer risk, but the results of epidemiologic studies remain inconsistent. We conducted a meta-analysis to summarize the evidence regarding the association between dietary fat intake and gastric cancer risk.

### Methods

A comprehensive search of PubMed and EMBASE was performed to identify observational studies providing quantitative estimates between dietary fat and gastric cancer risk. Random effects model was used to calculate the summary relative risk (SRR) in the highest versus lowest analysis. Categorical dose-response analysis was conducted to quantify the association between dietary fat intake and gastric cancer risk. Heterogeneity among studies was evaluated using  $I^2$  and  $\tau^2$  (between study variance) statistics. Subgroup analysis and publication bias analysis were also performed.

### Results

Twenty-two articles were included in the meta-analysis. The SRR for gastric cancer was 1.18 for individuals with highest intake versus lowest intake of total fat (95% confidence interval [CI]: 0.999–1.39;  $n = 28$ ;  $P < 0.001$ ;  $\tau^2 = 0.12$ ;  $I^2 = 69.5\%$ , 95% CI: 55%–79%) and 1.08 with a daily increase in total fat intake (20 g/d) (95% CI: 1.02–1.14;  $n = 6$ ;  $P = 0.09$ ;  $\tau^2 = 0.002$ ;  $I^2 = 46.8\%$ , 95% CI: 0%–79%). Positive association between saturated fat intake (SRR = 1.31; 95% CI: 1.09–1.58;  $n = 18$ ;  $P < 0.001$ ;  $\tau^2 = 0.08$ ;  $I^2 = 60.6\%$ , 95% CI: 34%–76%), inverse association between polyunsaturated fat intake (SRR = 0.77; 95% CI: 0.65–0.92;  $n = 16$ ;  $P = 0.003$ ;  $\tau^2 = 0.06$ ;  $I^2 = 56.2\%$ , 95% CI: 23%–75%) and vegetable fat intake (SRR = 0.55; 95% CI: 0.41–0.74;  $n = 4$ ;  $P = 0.12$ ;  $\tau^2 = 0.04$ ;  $I^2 = 48.6\%$ , 95% CI: 0%–83%), and no association between monounsaturated fat intake (SRR = 1.00; 95% CI: 0.79–1.25;  $n = 14$ ;  $P < 0.001$ ;  $\tau^2 = 0.10$ ;  $I^2 = 63.0\%$ , 95% CI: 34%–79%) and animal fat intake (SRR = 1.10; 95%

## OPEN ACCESS

**Citation:** Han J, Jiang Y, Liu X, Meng Q, Xi Q, Zhuang Q, et al. (2015) Dietary Fat Intake and Risk of Gastric Cancer: A Meta-Analysis of Observational Studies. PLoS ONE 10(9): e0138580. doi:10.1371/journal.pone.0138580

**Editor:** Chung-Jung Chiu, Tufts University, UNITED STATES

**Received:** May 4, 2015

**Accepted:** September 1, 2015

**Published:** September 24, 2015

**Copyright:** © 2015 Han et al. This is an open access article distributed under the terms of the [Creative Commons Attribution License](https://creativecommons.org/licenses/by/4.0/), which permits unrestricted use, distribution, and reproduction in any medium, provided the original author and source are credited.

**Data Availability Statement:** All relevant data are within the paper and its Supporting Information files.

**Funding:** This study was supported by National Natural Science Foundation of China (81372197).

**Competing Interests:** The authors have declared that no competing interests exist.

CI: 0.90–1.33;  $n = 6$ ;  $P = 0.13$ ;  $\tau^2 = 0.02$ ;  $I^2 = 42.0\%$ , 95% CI: 0%-70%) and gastric cancer risk were observed.

## Conclusions

Our results suggest that intake of total fat is potentially positively associated with gastric cancer risk, and specific subtypes of fats account for different effects. However, these findings should be confirmed by further well-designed cohort studies with detailed dietary assessments and strict control of confounders.

## Introduction

Gastric cancer, which account for about 10% of annual cancer-related deaths, remains one of the most common malignant tumors worldwide, especially in developing countries, such as Eastern Asia, Eastern Europe, and South America [1]. Development of gastric cancer is a complex and multifactorial process. Epidemiological studies have suggested that *Helicobacter pylori* infection and dietary factors play important roles in the etiology of gastric cancer [1, 2]. A distinction has been further observed between tumors arising in the proximal cardiac region (gastric cardia adenocarcinoma, GCA) and those arising in distal region (gastric non-cardia adenocarcinoma, GNCA) [3]. For example, *Helicobacter pylori* infection was reported to be positively associated with the risk of GNCA but not of GCA [4], while overweight and obesity seem to be associated with increased risk of GCA but not of GNCA [5]. However, an expert panel, convened by the World Cancer Research Fund and the American Institute for Cancer Research, pointed out that no dietary factor can be convincingly proved to be risk factors for gastric cancer [6]. In spite of that, consumption of salty food, salted preserved food, red meat, and processed meat is generally thought to increase the risk of gastric cancer [7–9], while consumption of fresh fruits, vegetables, and antioxidant vitamins may reduce the risk of gastric cancer [10–13]. Overall, the results of relevant studies on the effects of dietary factors on gastric cancer are inconsistent and need further investigation.

Dietary fat has been reported to be associated with various malignant tumors, such as breast cancer, colorectal cancer, pancreatic cancer, and prostate cancer [14–17]. However, similar to the effect of other dietary factors, the association between dietary fat and risk of these cancers remains controversial [18, 19]. Numerous epidemiologic studies have also evaluated the contribution of dietary fat to the risk of gastric cancer. Although some case-control studies reported that high intake of dietary fat could increase the risk of gastric cancer [20, 21], some other case-control studies reported null and even inverse effect of dietary fat on gastric cancer [22, 23]. As far as we know, only one cohort study (the NIH-AARP Diet and Health study) was conducted to evaluate the association between dietary fat intake and gastric cancer risk, however, no significant association was observed [24]. Considering possible different effects may exist between specific subtypes of fat (such as saturated fat, monounsaturated fat, and polyunsaturated fat,) on gastric cancer, it is thus more reasonable to separately analyze the effect of specific subtypes of fat. So far, very few epidemiologic studies have reported the association between intake of specific subtypes of fat and gastric cancer risk, and the existed ones gave inconsistent results.

Given the inconsistent results of previous observational studies, we performed this meta-analysis to summarize the evidence regarding the association between dietary fat intake and gastric cancer risk.

## Methods

### Literature search and study identification

A computerized literature search of PubMed and EMBASE databases was conducted to identify relevant literatures published up to March 2015 by two independent investigators (Han and Jiang). We used mesh words and text words (“gastric neoplasm (cancer)” OR “stomach neoplasm (cancer)”) AND (“diet” OR “dietary” OR “nutrient” OR “fat” OR “saturated fat” OR “unsaturated fat” OR “polyunsaturated fat” OR “monounsaturated fat” OR “animal fat” OR “vegetable fat”) to identify relevant studies. Reference lists of review articles and retrieved articles were also reviewed for additional relevant publications.

The eligibility criteria of the studies were as follows: 1) study designed as case-control or cohort study, 2) study evaluated the association between intake of dietary fat and gastric cancer risk, 3) study reported odds ratio (OR) or relative risk (RR) and 95% confidence intervals (CI) according to the highest versus the lowest intake of dietary fat or data sufficient to calculate them, and 4) study was published as a full paper in English. When the studies used the same data series, only the study with most complete results or with largest population was included.

### Data extraction and quality assessment

Two authors (Han and Jiang) independently extracted data from eligible studies using standardized forms (S1 Table). Disagreements were solved by discussion with coauthors. The following items were extracted from each study: first author's lastname, publication year, study location (country), study design type (case-control study or cohort study), number of cases, number of controls (or cohort size), dietary assessment tool, method of segregation according to dietary fat intake (tertile, quartile or quintile), fat subtypes, subgroups, RR (or OR) with their 95% CIs for the highest versus lowest category of fat intake, and adjusted factors in the analysis. If a study reported two different results adjusted for a single factor and multivariate factors, we only recorded the results adjusted for multivariate factors.

A 9-star system on the basis of the Newcastle-Ottawa Scale (NOS) was used to assess the study quality [25]. A total score of 7 or greater was defined as high quality study and a total score of 6 or smaller was defined as low quality study.

### Statistical analysis

All statistical analyses were performed with Stata version 11.0 (Stata, College Station, Texas, USA). In this analysis, we assumed OR to be comparable with the RR. For studies that only reported results for GCA and GNCA, men and women, or intestinal type and diffuse type separately, we considered them as independent data obtained from different studies. If no more than 3 studies reported the association between a specific subtype of fat and gastric cancer risk, we did not summarize the overall effect of it.

Firstly, we conducted a meta-analysis to compare the highest category with the lowest category intake of dietary fat. DerSimonian-Laird random effects model [26], accounting for heterogeneity among studies, was used to calculate summary relative risk (SRR) and 95% CIs. The possible heterogeneity among studies was examined by using the  $I^2$  and  $\tau^2$  (between study variance) statistics [27]. Sources of heterogeneity were assessed by subgroup analyses and meta-regression analyses [28]. Subgroup analyses were performed according to gastric cancer subtype (GCA, GNCA, and mixed), geographic area (North America, Europe, and Asia and others), the number of gastric cancer cases, study design type (cohort study, population-based case-control study, and hospital-based case-control study), dietary assessment methods (health habits and history questionnaire (HHHQ), food frequency questionnaire (FFQ) > 100 items AND

FFQ  $\leq$  100 items), and study quality (NOS scores). Sensitivity analyses were also conducted to estimate the influence of each study on the summary results by repeating the random effects meta-analysis after omitting one study at a time. The probability of publication bias was evaluated by visual inspection of asymmetry in funnel plots and Egger's test and Begg's test [29, 30]. And  $P$  value  $< 0.05$  was considered to be of significant publication bias.

Next, to assess the dose-response relationship between intake of dietary fat and gastric cancer risk, we conducted a meta-analysis of dose-response categorical data using the method proposed by Greenland and Orsini et al (2-stage GLST in Stata) [31, 32]. Studies were included for dose-response analysis only if they reported data for the distribution of cases and controls (or person-time) across at least three 3 categories of exposure (dietary fat intake). Medians for each category of intake levels were required in dose-response analysis. If medians were not reported, midpoint data of each category was considered to be medians. If the highest category and the lowest category were open-ended, we assumed that it had the same amplitude as the closest category. For this analysis, the result for total fat was presented per 20 g/d increment in dose-response analysis. A restricted cubic splines model with 3 knots was used to evaluate the potential nonlinear association between dietary fat intake and gastric cancer risk.

## Results

### Literature search, study characteristics and quality assessment

We identified 8087 articles after searching PubMed and EMBASE database. Titles and abstracts of 614 articles were reviewed after removing duplicate articles, non-original articles, non-human articles, and non-English articles. Full texts of 33 articles were reviewed after excluding 581 articles with no reports of the association between dietary fat intake and gastric cancer risk. Out of these 33 articles, 6 articles were excluded because they shared the same population with another 2 articles [33–38], 5 articles were excluded as they did not report 95% CI or data were not sufficient to calculate the 95% CI [39–43]. Finally, 22 articles were included in this meta-analysis (Fig 1) [20–24, 44–60].

Characteristics of the included studies are shown in S1 Table. Only one cohort study consisting of 494,978 participants and 955 gastric cancer cases was included in this meta-analysis. Of the 21 case-control studies involving 7672 cases and 20,100 controls, 6 were hospital-based and 15 were population-based. Out of 22 studies, 21, 14, 11, 12, 5, and 4 studies have investigated the associations between the gastric cancer risk and intake of total fat, saturated fat, monounsaturated fat, polyunsaturated fat, animal fat, and vegetable fat, respectively. Seven articles only separately reported results for GCA and GNCA, for men and women, or for intestinal type and diffuse type. We considered each separate report as an independent study. One study reported not only the overall result but also the separate result for GCA and GNCA [60], and we recorded all results in order to get a more accurate result in subgroup analysis. Besides, few studies have reported the results of a specific fatty acid (such as trans fat, n-3 fatty acid, oleic acid, linoleic acid, linolenic acid), we did not summarize the results of these studies. One study reported ORs according to two different time periods (during adolescence and 20 years prior to interview), and we only recorded the ORs of 20 years prior to interview [51].

The quality scores of included studies ranged from 4 to 9 based on the NOS score system. The one cohort study and 12 case-control studies were considered to be high quality studies (NOS score  $\geq 7$ ), whereas 9 other case-control studies were considered to be low quality studies (NOS score  $< 7$ ).

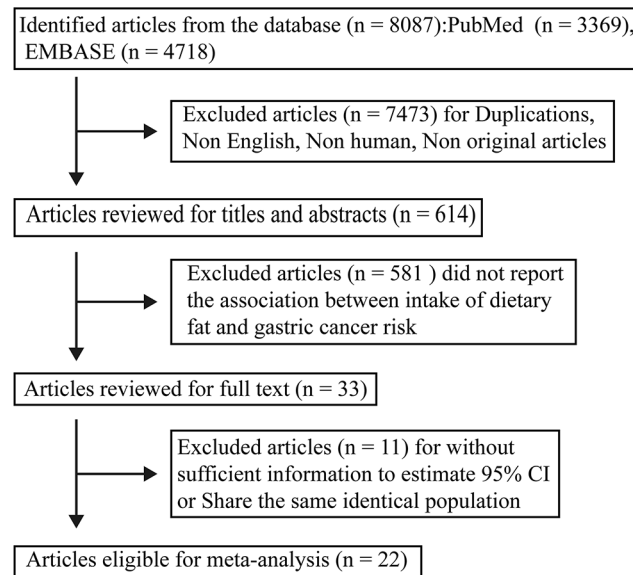

**Fig 1. Flow chart of study selection.**

doi:10.1371/journal.pone.0138580.g001

## Total fat consumption

Twenty-one articles with 28 studies have investigated the association between total fat intake and gastric cancer risk. The SRR for the highest compared with lowest analysis was 1.18 (95% CI: 0.999–1.39; Fig 2) by the random effects model, with a high heterogeneity ( $P < 0.001$ ;  $\tau^2 = 0.12$ ;  $I^2 = 69.5\%$ , 95% CI: 55%–79%).

Subgroup analyses were conducted to examine the stability of the pooled RRs. The results indicated that a positive association between the total fat intake and gastric cancer risk was observed in studies of GNCA patients (SRR = 1.31; 95% CI: 1.14–1.51;  $n = 6$ ;  $P = 0.49$ ;  $I^2 = 0.0\%$ ), studies located in North America (SRR = 1.47; 95% CI: 1.24–1.75;  $n = 13$ ;  $P = 0.18$ ;  $I^2 = 26.3\%$ ), population-based case-control studies (SRR = 1.23; 95% CI: 1.01–1.50;  $n = 18$ ;  $P < 0.001$ ;  $I^2 = 71.2\%$ ), studies using HHHQ (SRR = 1.69; 95% CI: 1.21–2.36;  $n = 3$ ;  $P = 0.46$ ;  $I^2 = 0.00\%$ ), and studies with a small sample size (SRR = 1.53; 95% CI: 1.14–2.07;  $n = 13$ ;  $P = 0.01$ ;  $I^2 = 53.8\%$ ) or low quality (SRR = 1.54; 95% CI: 1.15–1.89;  $n = 11$ ;  $P = 0.01$ ;  $I^2 = 56.9\%$ ). As shown in Table 1, no evidence of a positive association between total fat intake and gastric cancer risk was observed in other subgroups.

We also performed subgroup analyses according to different publications years (before 2000 and after 2000) to investigate the association between total fat intake and gastric cancer risk. The results showed no significant difference between two groups (studies published before 2000: SRR = 1.33; 95% CI: 0.97–1.82;  $n = 12$ ;  $P < 0.001$ ;  $\tau^2 = 0.22$ ;  $I^2 = 78.3\%$ ; studies published after 2000: SRR = 1.10; 95% CI: 0.90–1.33;  $n = 16$ ;  $P = 0.001$ ;  $\tau^2 = 0.08$ ;  $I^2 = 60.0\%$ ). No evidence of publication bias was observed in the subgroup published after 2000, as tested using Egger’s ( $P = 0.67$ ) and Begg’s ( $P = 1.00$ ) tests. But obvious publication bias was observed in the subgroup published before 2000, as tested using Egger’s ( $P = 0.02$ ) and Begg’s ( $P = 0.27$ ) tests. The results showed that publication bias was more likely in older studies, which was in agreement with previous study [61].

However, in sensitivity analysis by omitting one study each time, the SRR after exclusion one of 9 studies became statistically significant, with a range from 1.19 (95% CI: 1.002–1.41;

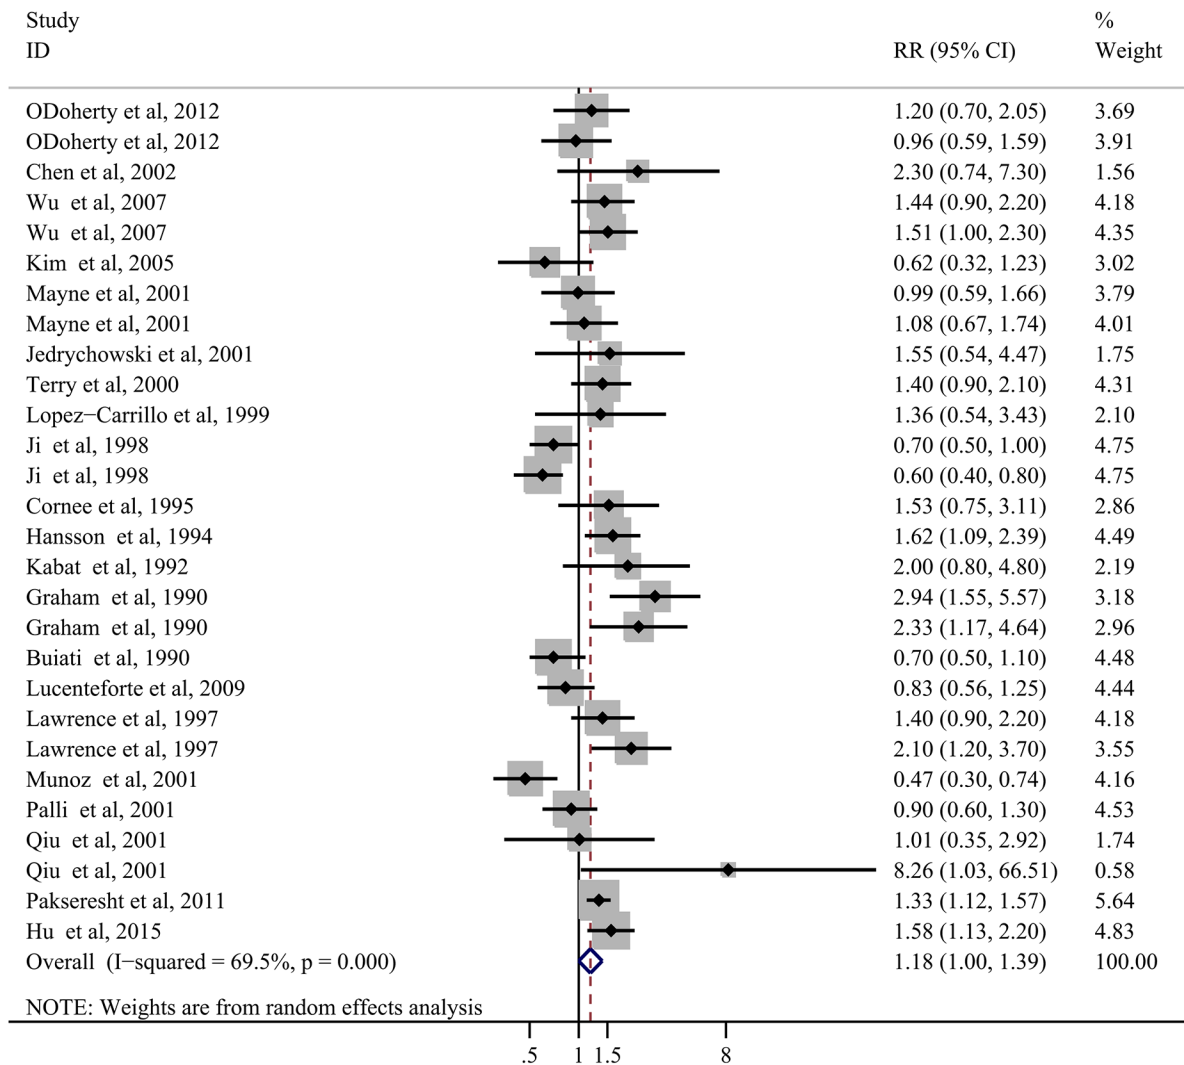

**Fig 2. Forest plots of total fat intake and gastric cancer risk based on highest versus lowest analysis.**

doi:10.1371/journal.pone.0138580.g002

$P < 0.001$ ;  $\tau^2 = 0.12$ ;  $I^2 = 70.5\%$ ) to 1.22 (95% CI: 1.04–1.43;  $P < 0.001$ ;  $\tau^2 = 0.10$ ;  $I^2 = 64.3\%$ ). Therefore, the non-significant association between total fat intake and gastric cancer risk should be interpreted with caution. No evidence of publication bias was observed in the funnel plot, as tested using Egger’s ( $P = 0.43$ ) and Begg’s ( $P = 0.29$ ) tests (Fig 3).

Unfortunately, only one cohort article (2 studies) and 3 case-control articles (4 studies) providing the distribution of cases and controls (person-year) were eligible for the dose-response analysis. The results showed that the SRR per 20 g/d total fat increase intake was 1.08 (95% CI: 1.02–1.14), with moderate heterogeneity ( $P = 0.09$ ;  $\tau^2 = 0.002$ ;  $I^2 = 46.8\%$ , 95% CI: 0%–79%). However, the increased risk of total fat increase intake per 20 g/d was only found in 4 case-control studies (SRR = 1.12; 95% CI: 1.03–1.22;  $P = 0.07$ ;  $I^2 = 57.5\%$ ) but not in 2 cohort studies (SRR = 1.03; 95% CI: 0.97–1.09;  $P = 0.67$ ;  $I^2 = 0.0\%$ ). There was no evident non-linear association between total fat intake and gastric cancer risk ( $P$ -nonlinearity = 0.50; Fig 4).



**Table 1. Subgroup analyses of dietary fat intake and gastric cancer risk, highest versus lowest.**

|                    |                  | Total fat |                  |                    |       | Saturated fat |                  |                    |       | Monounsaturated fat |                  |                    |       | Polyunsaturated fat |                  |                    |       |
|--------------------|------------------|-----------|------------------|--------------------|-------|---------------|------------------|--------------------|-------|---------------------|------------------|--------------------|-------|---------------------|------------------|--------------------|-------|
|                    |                  | N.        | SRR (95% CI)     | I <sup>2</sup> (%) | P     | N.            | SRR (95% CI)     | I <sup>2</sup> (%) | P     | N.                  | SRR (95% CI)     | I <sup>2</sup> (%) | P     | N.                  | SRR (95% CI)     | I <sup>2</sup> (%) | P     |
| Anatomic locations | GCA              | 5         | 1.23 (1.00–1.50) | 0.0%               | 0.79  | 3             | 1.20 (0.95–1.52) | 0.0%               | 0.40  | 2                   | 1.15 (0.88–1.52) | 0.0%               | 0.39  | 3                   | 0.98 (0.79–1.20) | 0.0%               | 0.43  |
|                    | GNCA             | 6         | 1.31 (1.14–1.51) | 0.0%               | 0.49  | 4             | 1.43 (1.16–1.76) | 0.0%               | 0.44  | 2                   | 1.15 (0.68–1.93) | 71.6%              | 0.06  | 3                   | 0.85 (0.67–1.09) | 38.9%              | 0.19  |
|                    | Mixed            | 18        | 1.14 (0.88–1.47) | 77.1%              | <0.01 | 11            | 1.32 (0.97–1.81) | 72.6%              | <0.01 | 10                  | 0.93 (0.67–1.28) | 66.9%              | <0.01 | 10                  | 0.63 (0.47–0.84) | 59.6%              | 0.01  |
| Regions            | North America    | 13        | 1.47 (1.24–1.75) | 26.3%              | 0.18  | 9             | 1.40 (1.21–1.62) | 17.2%              | 0.29  | 5                   | 1.15 (0.96–1.36) | 7.2%               | 0.37  | 7                   | 0.92 (0.81–1.05) | 1.7%               | 0.41  |
|                    | Europe           | 7         | 1.10 (0.83–1.44) | 57.2%              | 0.03  | 4             | 0.97 (0.73–1.28) | 23.9%              | 0.27  | 4                   | 0.89 (0.70–1.13) | 0.0%               | 0.78  | 4                   | 0.70 (0.55–0.89) | 0.0%               | 0.97  |
|                    | Asian and others | 8         | 0.84 (0.56–1.27) | 82.6%              | <0.01 | 5             | 1.71 (0.75–3.88) | 79.2%              | <0.01 | 5                   | 0.95 (0.40–2.23) | 79.8%              | <0.01 | 5                   | 0.44 (0.24–0.78) | 58.0%              | 0.05  |
| Design             | Cohort           | 2         | 1.06 (0.74–1.53) | 0.0%               | 0.55  | 2             | 1.14 (0.88–1.48) | 0.0%               | 0.43  | 2                   | 0.95 (0.74–1.24) | 0.0%               | 0.58  | 2                   | 0.95 (0.76–1.18) | 0.0%               | 1.00  |
|                    | PBCC             | 18        | 1.23 (1.01–1.50) | 71.2%              | <0.01 | 10            | 1.62 (1.21–2.16) | 69.8%              | <0.01 | 7                   | 1.26 (0.99–1.61) | 34.7%              | 0.16  | 9                   | 0.78 (0.59–1.01) | 66.2%              | <0.01 |
|                    | HBCC             | 8         | 1.11 (0.74–1.67) | 73.8%              | <0.01 | 6             | 1.04 (0.82–1.31) | 18.6%              | 0.29  | 5                   | 0.69 (0.46–1.05) | 58.3%              | 0.05  | 5                   | 0.61 (0.47–0.78) | 0.0%               | 0.50  |
| DietaryAssessment  | HHHQ             | 3         | 1.69 (1.21–2.36) | 0.0%               | 0.46  | 2             | 1.81 (0.71–4.60) | 57.8%              | 0.12  | 0                   |                  |                    |       | 0                   |                  |                    |       |
|                    | FFQ(>100 items)  | 12        | 1.10 (0.93–1.31) | 39.3%              | 0.08  | 10            | 1.19 (1.00–1.41) | 33.8%              | 0.14  | 8                   | 1.04 (0.87–1.25) | 21.0%              | 0.26  | 10                  | 0.87 (0.77–0.98) | 0.0%               | 0.53  |
|                    | FFQ(≤ 100 items) | 13        | 1.22 (0.88–1.70) | 80.7%              | <0.01 | 6             | 1.68 (0.99–2.85) | 79.8%              | 0.00  | 6                   | 1.00 (0.58–1.73) | 79.8%              | <0.01 | 6                   | 0.53 (0.32–0.88) | 77.2%              | <0.01 |
| N. (Case)          | N. > 250         | 15        | 1.03 (0.85–1.26) | 75.2%              | <0.01 | 9             | 1.22 (0.99–1.50) | 65.4%              | <0.01 | 7                   | 0.97 (0.73–1.29) | 74.7%              | <0.01 | 9                   | 0.84 (0.71–1.00) | 53.9%              | 0.03  |
|                    | N. ≤ 250         | 13        | 1.53 (1.14–2.07) | 53.8%              | 0.01  | 9             | 1.61 (1.09–2.38) | 58.8%              | <0.01 | 7                   | 1.07 (0.70–1.63) | 47.4%              | 0.08  | 7                   | 0.58 (0.38–0.88) | 48.5%              | 0.07  |
| Study quality      | Score ≥ 7        | 17        | 1.03 (0.84–1.25) | 71.6%              | <0.01 | 12            | 1.36 (1.08–1.71) | 69.2%              | <0.01 | 10                  | 1.06 (0.80–1.40) | 70.9%              | <0.01 | 12                  | 0.77 (0.63–0.96) | 66.6%              | <0.01 |

(Continued)

Table 1. (Continued)

|           | Total fat |                     |                    |      | Saturated fat |                     |                    |      | Monounsaturated fat |                     |                    |      | Polyunsaturated fat |                     |                    |      |
|-----------|-----------|---------------------|--------------------|------|---------------|---------------------|--------------------|------|---------------------|---------------------|--------------------|------|---------------------|---------------------|--------------------|------|
|           | N.        | SRR (95% CI)        | I <sup>2</sup> (%) | P    | N.            | SRR (95% CI)        | I <sup>2</sup> (%) | P    | N.                  | SRR (95% CI)        | I <sup>2</sup> (%) | P    | N.                  | SRR (95% CI)        | I <sup>2</sup> (%) | P    |
| Score ≤ 6 | 11        | 1.54<br>(1.15–1.89) | 56.9%              | 0.01 | 6             | 1.20<br>(0.89–1.62) | 28.8%              | 0.23 | 4                   | 0.82<br>(0.61–1.10) | 0.0%               | 0.49 | 4                   | 0.70<br>(0.52–0.95) | 0.0%               | 0.96 |

SRR, summary relative risk  
 CI, confidence interval  
 USA, United States of America  
 GCA, gastric cardia adenocarcinoma  
 GNCA, gastric non-cardia adenocarcinoma  
 NOS, Newcastle-Ottawa Scale  
 N., number  
 PBCC, Population-based case-control  
 HBCC, Hospital-based case-control  
 HHHQ, health habits and history questionnaire  
 FFQ, food frequency questionnaire.

doi:10.1371/journal.pone.0138580.t001

### Saturated fat consumption

Fourteen articles with 18 studies have investigated the association between saturated fat intake and gastric cancer risk. The SRR for the highest compared with lowest analysis was 1.31 (95% CI: 1.09–1.58), indicating a significant positive association (Fig 5). However, significant heterogeneity among studies was found ( $P < 0.001$ ;  $\tau^2 = 0.08$ ;  $I^2 = 60.6\%$ , 95% CI: 34%–76%).

Subgroup analyses were then applied. Significant positive association between saturated fat intake and gastric cancer risk was only found in studies of GNCA patients (SRR = 1.43; 95%

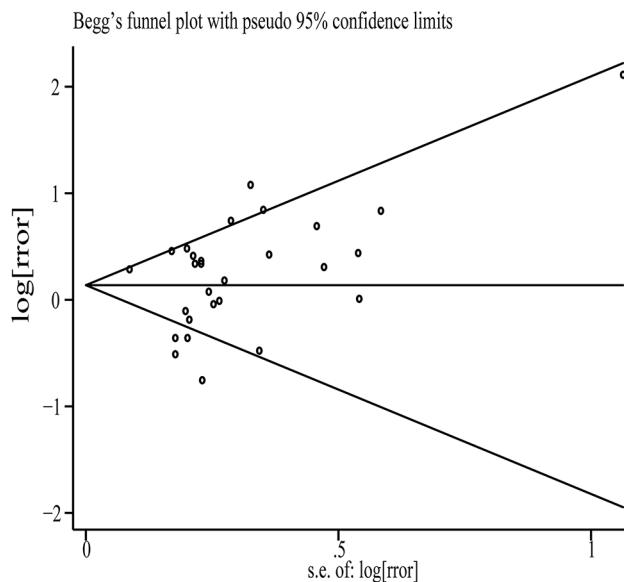

Fig 3. Begg's funnel plots of studies for total fat intake and gastric cancer risk.

doi:10.1371/journal.pone.0138580.g003



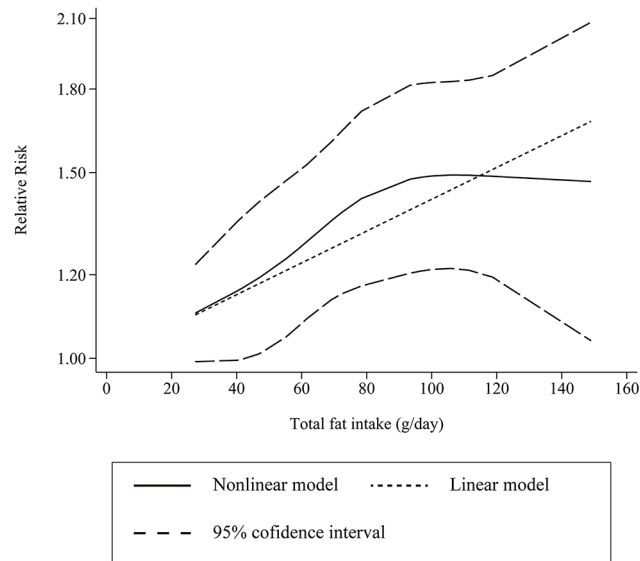

**Fig 4. Dose-response relationship for total fat intake level and the RR of gastric cancer risk (*P*-nonlinearity = 0.50).**

doi:10.1371/journal.pone.0138580.g004

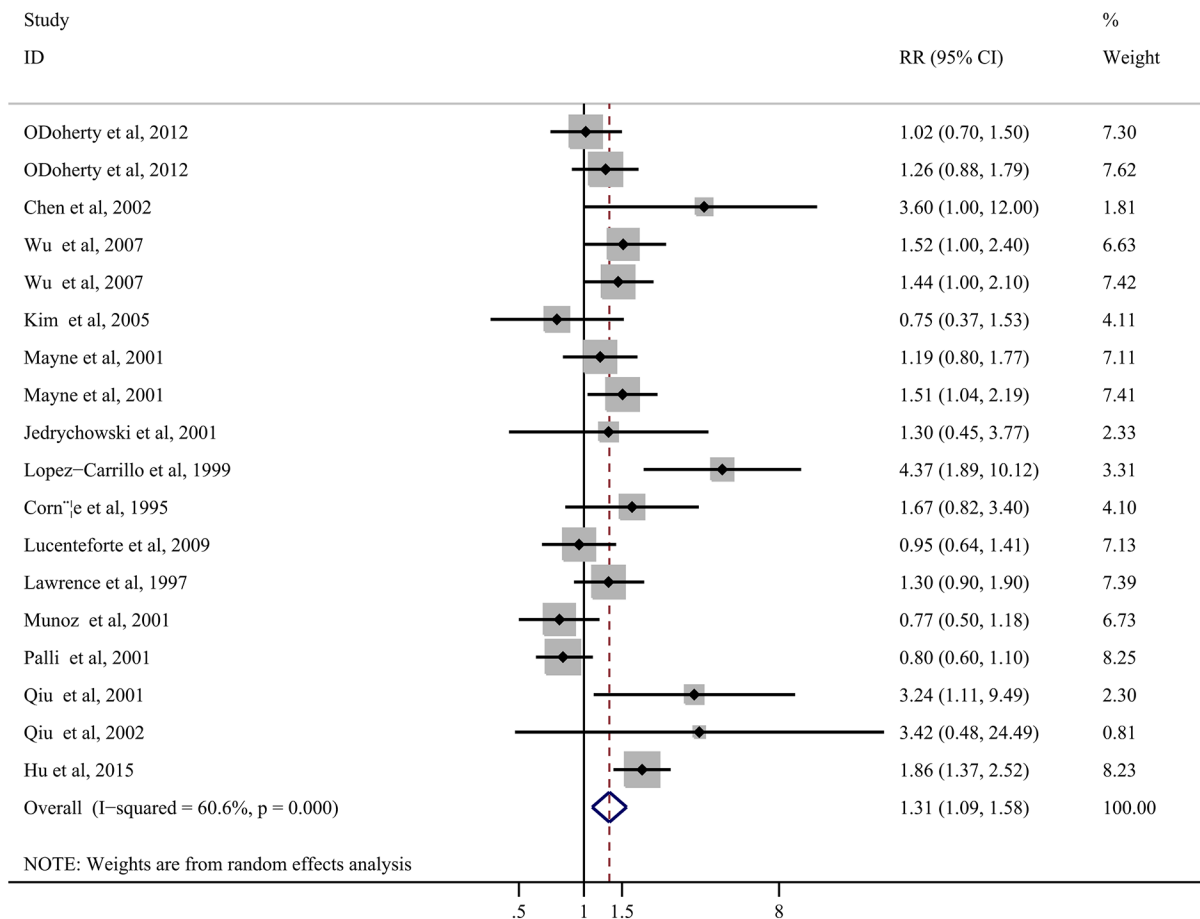

**Fig 5. Forest plots of saturated fat intake and gastric cancer risk based on highest versus lowest analysis.**

doi:10.1371/journal.pone.0138580.g005

CI: 1.16–1.76;  $n = 4$ ;  $P = 0.44$ ;  $I^2 = 0.0\%$ ), studies located in North America (SRR = 1.40; 95% CI: 1.21–1.62;  $n = 9$ ;  $P = 0.29$ ;  $I^2 = 17.2\%$ ), population-based case-control studies (SRR = 1.62; 95% CI: 1.21–2.16;  $n = 10$ ;  $P < 0.001$ ;  $I^2 = 69.8\%$ ), studies with a small sample size (SRR = 1.61; 95% CI: 1.09–2.38;  $n = 9$ ;  $P = 0.01$ ;  $I^2 = 58.8\%$ ), and high quality studies (SRR = 1.36; 95% CI: 1.08–1.71;  $n = 12$ ;  $P = 0.00$ ;  $I^2 = 69.2\%$ ), but not in other subgroups (Table 1).

Sensitivity analysis showed that no individual study could change the summary positive association between saturated fat intake and gastric cancer risk. There was no evidence of publication bias, as tested using Egger's ( $P = 0.15$ ) and Begg's ( $P = 0.34$ ) tests. Unfortunately, only 3 studies (from 2 articles) were eligible for the dose-response analysis. Thus, we did not perform dose-response analysis in this group.

### Polyunsaturated fat consumption

Twelve articles with 16 studies have investigated the association between polyunsaturated fat intake and gastric cancer risk. The SRR for the highest compared with lowest analysis was 0.77 (95% CI: 0.65–0.92), indicating a significant inverse association. However, significant heterogeneity was detected ( $P = 0.003$ ;  $\tau^2 = 0.06$ ;  $I^2 = 56.2\%$ , 95% CI: 23%–75%; Fig 6).

In subgroup analysis, the inverse association between polyunsaturated fat intake and gastric cancer risk was no more significant when we restricted to studies of GCA patients (SRR = 0.98; 95% CI: 0.79–1.20;  $n = 3$ ;  $P = 0.43$ ;  $I^2 = 0.0\%$ ) or GNCA patients only (SRR = 0.85; 95% CI: 0.67–1.09,  $n = 3$ ;  $P = 0.19$ ,  $I^2 = 38.9\%$ ), studies located in North America (SRR = 0.92; 95% CI: 0.81–1.05;  $n = 7$ ;  $P = 0.41$ ,  $I^2 = 1.7\%$ ), cohort studies (SRR = 0.95, 95% CI: 0.76–1.18;  $n = 2$ ;  $P = 1.00$ ,  $I^2 = 0.0\%$ ), population-based case-control studies (SRR = 0.78; 95% CI: 0.59–1.01;  $n = 9$ ;  $P = 0.00$ ,  $I^2 = 66.2\%$ ), and studies with a large sample size (SRR = 0.84; 95% CI: 0.71–1.00;  $n = 9$ ;  $P = 0.03$ ,  $I^2 = 53.9\%$ ). In other subgroups, the summary results were consistent with the overall results of all studies (Table 1).

No individual study could change the summary results in the sensitivity analyses. No significant evidence of publication bias was detected, as tested using Egger's ( $P = 0.11$ ) and Begg's ( $P = 0.06$ ) tests. We did not perform dose-response analysis in this group due to very few eligible studies.

### Monounsaturated fat consumption

Eleven articles with 14 studies have investigated the association between monounsaturated fat intake and gastric cancer risk. The SRR for the highest compared with lowest analysis was 1.00 (95% CI: 0.79–1.25), with significant heterogeneity among studies ( $P < 0.001$ ;  $\tau^2 = 0.10$ ;  $I^2 = 63.0\%$ , 95% CI: 34%–79%).

In subgroup analyses, the results were fairly consistent with the overall summary estimates when the analyses were restricted to any subgroup (Table 1), indicating no association between monounsaturated fat intake and gastric cancer risk in any subgroup. Sensitivity analysis showed that SRR was not markedly modified by any individual study. No evidence of publication bias was detected, as tested using Egger's ( $P = 0.67$ ) and Begg's ( $P = 0.74$ ) tests. Dose-response analysis was not performed due to too few eligible studies.

### Animal fat and vegetable fat consumption

Out of the included studies, 6 studies (from 5 articles) and 4 studies have investigated the associations between intake of animal fat and vegetable fat and gastric cancer risk, respectively. The SRRs for the highest compared with lowest analysis were 1.10 (95% CI: 0.90–1.33;  $P = 0.13$ ;  $\tau^2 = 0.02$ ;  $I^2 = 42.0\%$ , 95% CI: 0%–70%) and 0.55 (95% CI: 0.41–0.74;  $P = 0.12$ ;  $\tau^2 = 0.04$ ;  $I^2 = 48.6\%$ , 95% CI: 0%–83%), respectively. The results indicated that consumption of vegetable fat

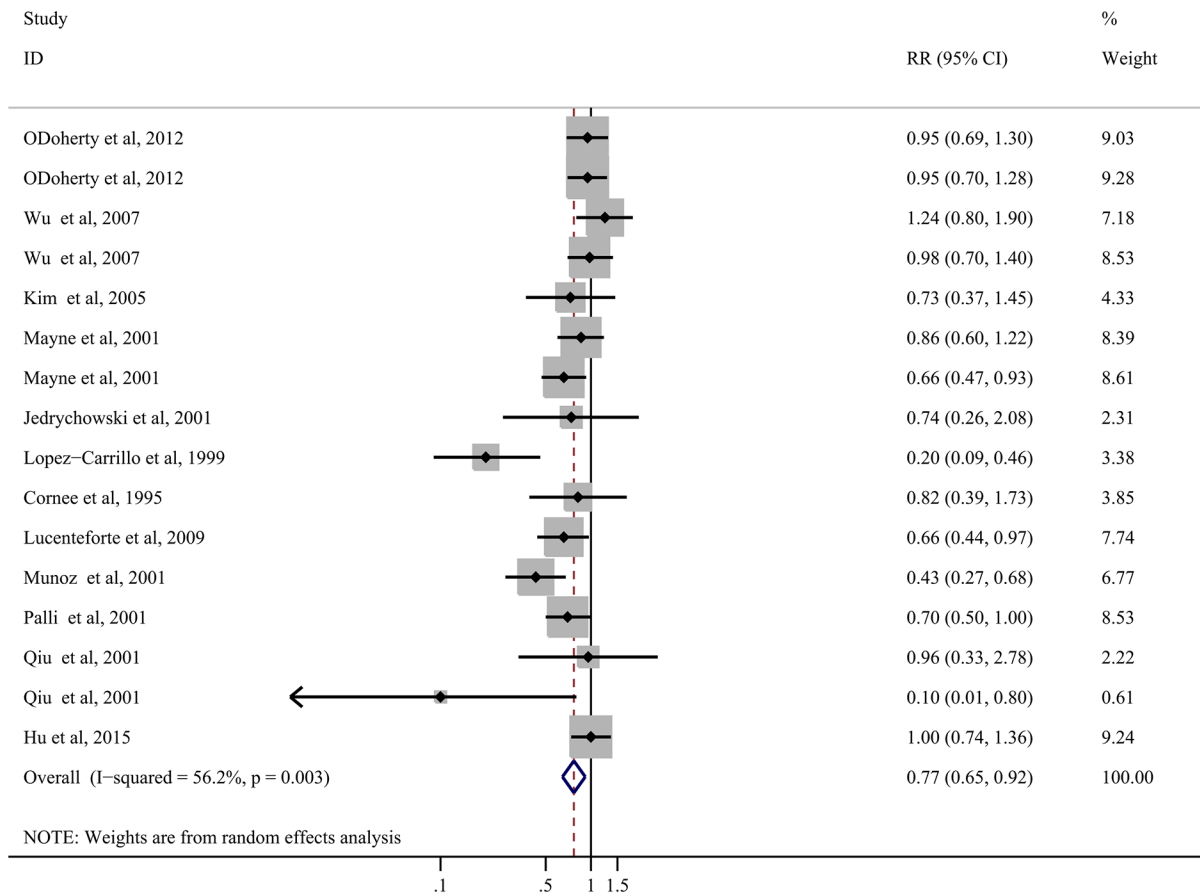

**Fig 6. Forest plots of polyunsaturated fat intake and gastric cancer risk based on highest versus lowest analysis.**

doi:10.1371/journal.pone.0138580.g006

but not animal fat could reduce the risk of gastric cancer. Sensitivity analyses showed SRRs were not markedly modified by any individual study in two groups.

### Discussion

Although the result of highest versus lowest meta-analysis does not strongly support a positive association between intake of total fat and gastric cancer risk, the result of the dose-response analysis indicate that a daily increase intake of 20 g total fat is significantly associated with a 8% higher risk of gastric cancer. Our highest versus lowest meta-analyses support a positive association between intake of saturated fat and gastric cancer risk, an inverse association between intake of polyunsaturated fat and vegetable fat and gastric cancer risk, and no association between intake of monounsaturated fat and animal fat and gastric cancer risk.

In subgroup analyses, we observed that high intake of total fat was positively associated with gastric cancer risk in studies conducted in North America without evident heterogeneity. The adverse effect of total fat in North America might attribute to the high fat diet habits of people living in western countries [62, 63]. However, we did not observe similar effect of total fat in European countries. When we analyzed each study in European countries, 3 studies from Italy reported that the total fat tended to decrease the risk of gastric cancer (RR < 1). However, 4 studies conducted in other European countries reported that the total fat tended to increase the risk of gastric cancer (RR > 1). This indicated that the dietary structure and nutrient intake

of Italian might be different from people in other western countries [64, 65]. Moreover, positive associations between consumption of total fat and gastric cancer were more common in studies with small sample size and low quality. Thus, the association between total fat intake and gastric cancer risk should be interpreted with caution.

Epidemiological and experimental studies have suggested that different fatty acid play different roles in the carcinogenesis and progression of human cancers [66]. In this meta-analysis, we found different associations between specific fatty acid intake and gastric cancer risk, indicating that different fatty acid did have different effects on gastric cancer.

As for saturated fat, our results were consistent with a majority of studies which showed that high intake of saturated fat could increase the risk of malignant tumors (such as breast and colorectal cancer) [14, 67–69]. However, saturated fat was found not to be associated with some other cancers [18, 70]. In experimental studies, diets with a high content in saturated fat were demonstrated to promote the tumorigenesis [71]. Interestingly, in subgroups analysis of our meta-analysis, intake of saturated fat significantly associated with GNCA risk but not GCA risk, which was consistent with the results of total fat. The difference may partly due to the small number of studies that provide the separate data for GNCA and GCA. However, as reported before, some other risk factors for gastric cancer were not consistent across all cancer sites either [72–74]. It is now clear that two anatomic locations of stomach, cardia and non-cardia, present distinct and sometimes opposite epidemiological characteristics [75]. Therefore, future studies need to distinguish those two different anatomic locations. In addition, saturated fat was considered to be a significant risk factor for people living in North America, which was in line with the results of total fat, suggesting that saturated fat maybe the main source of dietary total fat in North America [76].

The major monounsaturated fatty acid found in human diet isoleic acid. Mediterranean diet, characterized by the high consumption of olive oil, rich in oleic acid, has been traditionally linked to a protective effect on cancers [77]. In a cohort study including 485,044 subjects from 10 European countries, adherence to a relative Mediterranean diet was associated with a significant reduction of gastric cancer risk [78]. Similar protective effect of Mediterranean diet for breast cancer and colorectal cancer was observed [79, 80]. However, the protective effect of olive oil for gastric cancer was not observed in a study focused on olive oil but not Mediterranean diet [35]. This might be interpreted by the complex composition of Mediterranean diet (such as high consumption of fruit, vegetables, fish, and seafood) [77]. In our meta-analysis, high intake of monounsaturated fat (including oleic acid) showed no significant association with gastric cancer risk, which was consistent with the results of colorectal cancer [18]. In fact, some differences exist between single chemically defined nutrients (such as oleic acid) and foodstuff (such as olive oil) [81]. Olive oil contains not only oleic acid as nutrient but also many minor compounds which were defined as “bioactive compounds” and exerted main protective effects of cancer [82, 83]. Moreover, experimental studies have provided evidence of olive oil to influence the hormonal status, cell membranes structure and function, signal transduction pathways, gene expression and the immune system [71].

Opposite to our findings of protective effect of polyunsaturated fat on gastric cancer, polyunsaturated fat was considered to increase the risk of breast cancer and had no effect on colorectal cancer [18, 68]. It was reported that n-3 and n-6 polyunsaturated fatty acids (PUFAs) may have different functions in the process of carcinogenesis. Generally, n-6 PUFAs stimulated the development of cancers whereas n-3 PUFAs may inhibit the development of cancers such as breast cancer and colorectal cancer [71]. Unfortunately, in our meta-analysis, a majority of included studies provided the overall effect of polyunsaturated fat but not n-3 PUFAs and n-6 PUFAs separately. When the overall effects were combined, an inverse association was observed between polyunsaturated fat intake and gastric cancer risk. In a large systematic

review of cohort studies published before 2006, which investigated the association between n-3 PUFAs and a variety of cancers, no consistent evidence of a reduced risk of any cancer (including gastric cancer) was observed [84]. Therefore, the author declared that dietary supplementation with n-3 PUFAs was unlikely to prevent any cancer. In the cohort study included in this meta-analysis, no association was observed between n-3 PUFAs and gastric cancer risk either. However, experimental studies have demonstrated that n-3 PUFAs induced cell apoptosis in human colorectal cancer, breast cancer, pancreatic cancer, and prostatic cancer [85–88]. N-3 PUFAs was also demonstrated to exert an anti-cancer effect on gastric cancer by inducing apoptosis of gastric cancer cells via ADORA1 [89]. In addition, n-3 PUFAs emulsion-based parenteral nutrition alleviated the inflammatory reaction and reduced the rate of inflammatory complications after gastric cancer [90]. Taken together, whether n-3 PUFAs exert a protective effect on gastric cancer needs further analysis.

In this meta-analysis, we observed an inverse association between vegetable fat intake and gastric cancer risk and no association for animal fat. However, it has been shown that for small meta-analyses homogeneity is often assumed when this is not the case and existing heterogeneity is not detected [91]. In addition, the compositions of vegetable fat and animal fat are complex. Thus, the association between vegetable and animal fat intake and gastric cancer risk should be interpreted with caution.

Our meta-analysis had several strengths. As far as we known, it is the first meta-analysis focused on the association between dietary fat intake and gastric cancer risk. Our meta-analysis included a large number of studies and more than 9,000 cases, and over 500,000 non-cases in this analysis. Thus we had adequate statistical power to clarify the association between dietary fat intake and gastric cancer risk. We have also quantified the association between intake of dietary fat and gastric cancer risk by carrying out dose-response analyses and the results were generally consistent with the highest versus lowest analysis.

This meta-analysis has several limitations. First, only one cohort study was included and the rest 21 studies were case-control studies, which may introduce recall bias and selection bias, especially the hospital-based case-control studies. The associations between intake of polyunsaturated fat and saturated fat and gastric cancer risk were not statistically significant in the cohort study but are statistically significant in the case-control studies. More cohort studies are needed to confirm the association in this cohort study. Second, most of included case-control studies did not report the doses or number of cases and controls for each category. Therefore, the results of dose-response analysis were not credible because too few eligible studies were available for the dose-response meta-analysis. Future studies should report the complete results with standardized dietary fat categories and number of cases and control in order to assess the dose-response relationship. Third, a majority of studies only adjusted for age, sex, and total energy intake. Some other known risk factors for gastric cancer such as family history, BMI, and *Helicobacter pylori* infection were not adjusted in most studies. Thus, the possibility of residual confounders as potential explanation for the observed association between dietary fat intake and gastric cancer risk could not be excluded. Moreover, it could not be excluded that other nutrients or dietary components that were correlated with dietary fat might be responsible for the observed associations. Fourth, most studies used food frequency questionnaires to assess dietary fat intake. However, as reported before, measurement errors associated with the use of food frequency questionnaires may obscure associations between dietary fat intake and gastric cancer risk [92]. Fifth, highest and lowest category intake of dietary fat were differently defined in various studies. Therefore, the effect of dietary fat may be exaggerated in studies using quintile than quartile and tertile. Sixth, we assumed OR to be comparable with the RR in this study, which might introduce bias, although baseline risks are not low in our analyses [93]. Finally, publication bias may be a problem in any meta-analysis. Although publication bias was

not observed in this meta-analysis, some excluded studies due to the incomplete report may introduce bias. In addition, we restrict the language to English only, which may introduce language bias.

In conclusion, results from this meta-analysis indicate a possible significant positive association between total fat intake and gastric cancer risk. Consumption of saturated fat is positively associated with gastric cancer risk. Consumption of polyunsaturated fat and vegetable fat is inversely associated with gastric cancer risk. Consumption of monounsaturated fat and animal fat is not associated with gastric cancer risk. Caution is needed in interpreting these associations because the results of subgroups analyses were not always consistent. Additional well-designed cohort studies with detailed dietary assessment and strict control of confounders are needed to confirm the associations between dietary fat intake and gastric cancer risk.

## Supporting Information

### S1 Checklist. PRISMA Checklist of this meta-analysis.

(DOC)

### S1 Table. Characteristic of the studies with regard to dietary fat intake and gastric cancer risk.

(DOCX)

## Author Contributions

Conceived and designed the experiments: GHW JH. Performed the experiments: JH YJ QYM QLX. Analyzed the data: JH XL QLZ. Contributed reagents/materials/analysis tools: YSH YG QRD. Wrote the paper: JH GHW YJ.

## References

1. Jemal A, Bray F, Center MM, Ferlay J, Ward E, Forman D. Global cancer statistics. *CA: a cancer journal for clinicians*. 2011; 61(2):69–90. doi: [10.3322/caac.20107](https://doi.org/10.3322/caac.20107) PMID: [21296855](https://pubmed.ncbi.nlm.nih.gov/21296855/).
2. Parkin DM. The global health burden of infection-associated cancers in the year 2002. *International journal of cancer*. 2006; 118(12):3030–44. doi: [10.1002/ijc.21731](https://doi.org/10.1002/ijc.21731) PMID: [16404738](https://pubmed.ncbi.nlm.nih.gov/16404738/).
3. McColl KE, Going JJ. Aetiology and classification of adenocarcinoma of the gastro-oesophageal junction/cardia. *Gut*. 2010; 59(3):282–4. doi: [10.1136/gut.2009.186825](https://doi.org/10.1136/gut.2009.186825) PMID: [20207629](https://pubmed.ncbi.nlm.nih.gov/20207629/).
4. Helicobacter, Cancer Collaborative G. Gastric cancer and *Helicobacter pylori*: a combined analysis of 12 case control studies nested within prospective cohorts. *Gut*. 2001; 49(3):347–53. PMID: [11511555](https://pubmed.ncbi.nlm.nih.gov/11511555/).
5. Yang P, Zhou Y, Chen B, Wan HW, Jia GQ, Bai HL, et al. Overweight, obesity and gastric cancer risk: results from a meta-analysis of cohort studies. *European journal of cancer*. 2009; 45(16):2867–73. doi: [10.1016/j.ejca.2009.04.019](https://doi.org/10.1016/j.ejca.2009.04.019) PMID: [19427197](https://pubmed.ncbi.nlm.nih.gov/19427197/).
6. Wiseman M. The second World Cancer Research Fund/American Institute for Cancer Research expert report. Food, nutrition, physical activity, and the prevention of cancer: a global perspective. *The Proceedings of the Nutrition Society*. 2008; 67(3):253–6. doi: [10.1017/S002966510800712X](https://doi.org/10.1017/S002966510800712X) PMID: [18452640](https://pubmed.ncbi.nlm.nih.gov/18452640/).
7. D'Elia L, Rossi G, Ippolito R, Cappuccio FP, Strazzullo P. Habitual salt intake and risk of gastric cancer: a meta-analysis of prospective studies. *Clinical nutrition*. 2012; 31(4):489–98. doi: [10.1016/j.clnu.2012.01.003](https://doi.org/10.1016/j.clnu.2012.01.003) PMID: [22296873](https://pubmed.ncbi.nlm.nih.gov/22296873/).
8. Ge S, Feng X, Shen L, Wei Z, Zhu Q, Sun J. Association between Habitual Dietary Salt Intake and Risk of Gastric Cancer: A Systematic Review of Observational Studies. *Gastroenterology research and practice*. 2012; 2012:808120. doi: [10.1155/2012/808120](https://doi.org/10.1155/2012/808120) PMID: [23125851](https://pubmed.ncbi.nlm.nih.gov/23125851/).
9. Zhu H, Yang X, Zhang C, Zhu C, Tao G, Zhao L, et al. Red and processed meat intake is associated with higher gastric cancer risk: a meta-analysis of epidemiological observational studies. *PloS one*. 2013; 8(8):e70955. doi: [10.1371/journal.pone.0070955](https://doi.org/10.1371/journal.pone.0070955) PMID: [23967140](https://pubmed.ncbi.nlm.nih.gov/23967140/).
10. Freedman ND, Subar AF, Hollenbeck AR, Leitzmann MF, Schatzkin A, Abnet CC. Fruit and vegetable intake and gastric cancer risk in a large United States prospective cohort study. *Cancer causes & control*. 2008; 19(5):459–67. doi: [10.1007/s10552-007-9107-4](https://doi.org/10.1007/s10552-007-9107-4) PMID: [18166992](https://pubmed.ncbi.nlm.nih.gov/18166992/).



11. Jeurnink SM, Buchner FL, Bueno-de-Mesquita HB, Siersema PD, Boshuizen HC, Numans ME, et al. Variety in vegetable and fruit consumption and the risk of gastric and esophageal cancer in the European Prospective Investigation into Cancer and Nutrition. *International journal of cancer*. 2012; 131(6): E963–73. doi: [10.1002/ijc.27517](https://doi.org/10.1002/ijc.27517) PMID: [22392502](https://pubmed.ncbi.nlm.nih.gov/22392502/).
12. Zhou Y, Wang T, Meng Q, Zhai S. Association of carotenoids with risk of gastric cancer: A meta-analysis. *Clinical nutrition*. 2015. doi: [10.1016/j.clnu.2015.02.003](https://doi.org/10.1016/j.clnu.2015.02.003) PMID: [25726725](https://pubmed.ncbi.nlm.nih.gov/25726725/).
13. Li P, Zhang H, Chen J, Shi Y, Cai J, Yang J, et al. Association between dietary antioxidant vitamins intake/blood level and risk of gastric cancer. *International journal of cancer Journal*. 2014; 135(6):1444–53. doi: [10.1002/ijc.28777](https://doi.org/10.1002/ijc.28777) PMID: [24510802](https://pubmed.ncbi.nlm.nih.gov/24510802/).
14. Butler LM, Wang R, Koh WP, Stern MC, Yuan JM, Yu MC. Marine n-3 and saturated fatty acids in relation to risk of colorectal cancer in Singapore Chinese: a prospective study. *International journal of cancer*. 2009; 124(3):678–86. doi: [10.1002/ijc.23950](https://doi.org/10.1002/ijc.23950) PMID: [18973226](https://pubmed.ncbi.nlm.nih.gov/18973226/).
15. Arem H, Mayne ST, Sampson J, Risch H, Stolzenberg-Solomon RZ. Dietary fat intake and risk of pancreatic cancer in the Prostate, Lung, Colorectal and Ovarian Cancer Screening Trial. *Annals of epidemiology*. 2013; 23(9):571–5. doi: [10.1016/j.annepidem.2013.06.006](https://doi.org/10.1016/j.annepidem.2013.06.006) PMID: [23890797](https://pubmed.ncbi.nlm.nih.gov/23890797/).
16. Thiebaut AC, Kipnis V, Chang SC, Subar AF, Thompson FE, Rosenberg PS, et al. Dietary fat and post-menopausal invasive breast cancer in the National Institutes of Health-AARP Diet and Health Study cohort. *Journal of the National Cancer Institute*. 2007; 99(6):451–62. doi: [10.1093/jnci/djk094](https://doi.org/10.1093/jnci/djk094) PMID: [17374835](https://pubmed.ncbi.nlm.nih.gov/17374835/).
17. Jansen RJ, Robinson DP, Frank RD, Anderson KE, Bamlet WR, Oberg AL, et al. Fatty acids found in dairy, protein and unsaturated fatty acids are associated with risk of pancreatic cancer in a case-control study. *International journal of cancer*. 2014; 134(8):1935–46. doi: [10.1002/ijc.28525](https://doi.org/10.1002/ijc.28525) PMID: [24590454](https://pubmed.ncbi.nlm.nih.gov/24590454/).
18. Liu L, Zhuang W, Wang RQ, Mukherjee R, Xiao SM, Chen Z, et al. Is dietary fat associated with the risk of colorectal cancer? A meta-analysis of 13 prospective cohort studies. *European journal of nutrition*. 2011; 50(3):173–84. doi: [10.1007/s00394-010-0128-5](https://doi.org/10.1007/s00394-010-0128-5) PMID: [20697723](https://pubmed.ncbi.nlm.nih.gov/20697723/).
19. Shen QW, Yao QY. Total fat consumption and pancreatic cancer risk: a meta-analysis of epidemiologic studies. *European journal of cancer prevention*. 2014. doi: [10.1097/CEJ.000000000000073](https://doi.org/10.1097/CEJ.000000000000073) PMID: [25089377](https://pubmed.ncbi.nlm.nih.gov/25089377/).
20. Graham S, Haughey B, Marshall J, Brasure J, Zielezny M, Freudenheim J, et al. Diet in the epidemiology of gastric cancer. *Nutrition and cancer*. 1990; 13(1–2):19–34. doi: [10.1080/01635589009514042](https://doi.org/10.1080/01635589009514042) PMID: [2300492](https://pubmed.ncbi.nlm.nih.gov/2300492/).
21. Hu J, La Vecchia C, Negri E, de Groh M, Morrison H, Mery L, et al. Macronutrient intake and stomach cancer. *Cancer causes & control*. 2015. doi: [10.1007/s10552-015-0557-9](https://doi.org/10.1007/s10552-015-0557-9) PMID: [25791128](https://pubmed.ncbi.nlm.nih.gov/25791128/).
22. Ji BT, Chow WH, Yang G, McLaughlin JK, Zheng W, Shu XO, et al. Dietary habits and stomach cancer in Shanghai, China. *International journal of cancer*. 1998; 76(5):659–64. PMID: [9610722](https://pubmed.ncbi.nlm.nih.gov/9610722/).
23. Mayne ST, Risch HA, Dubrow R, Chow WH, Gammon MD, Vaughan TL, et al. Nutrient intake and risk of subtypes of esophageal and gastric cancer. *Cancer epidemiology, biomarkers & prevention*. 2001; 10(10):1055–62. PMID: [11588131](https://pubmed.ncbi.nlm.nih.gov/11588131/).
24. O'Doherty MG, Freedman ND, Hollenbeck AR, Schatzkin A, Murray LJ, Cantwell MM, et al. Association of dietary fat intakes with risk of esophageal and gastric cancer in the NIH-AARP diet and health study. *International journal of cancer*. 2012; 131(6):1376–87. doi: [10.1002/ijc.27366](https://doi.org/10.1002/ijc.27366) PMID: [22116732](https://pubmed.ncbi.nlm.nih.gov/22116732/).
25. Stang A. Critical evaluation of the Newcastle-Ottawa scale for the assessment of the quality of nonrandomized studies in meta-analyses. *European journal of epidemiology*. 2010; 25(9):603–5. doi: [10.1007/s10654-010-9491-z](https://doi.org/10.1007/s10654-010-9491-z) PMID: [20652370](https://pubmed.ncbi.nlm.nih.gov/20652370/).
26. DerSimonian R, Laird N. Meta-analysis in clinical trials. *Controlled clinical trials*. 1986; 7(3):177–88. PMID: [3802833](https://pubmed.ncbi.nlm.nih.gov/3802833/).
27. Higgins JP, Thompson SG, Deeks JJ, Altman DG. Measuring inconsistency in meta-analyses. *Bmj*. 2003; 327(7414):557–60. doi: [10.1136/bmj.327.7414.557](https://doi.org/10.1136/bmj.327.7414.557) PMID: [12958120](https://pubmed.ncbi.nlm.nih.gov/12958120/).
28. Thompson SG, Higgins JP. How should meta-regression analyses be undertaken and interpreted? *Statistics in medicine*. 2002; 21(11):1559–73. doi: [10.1002/sim.1187](https://doi.org/10.1002/sim.1187) PMID: [12111920](https://pubmed.ncbi.nlm.nih.gov/12111920/).
29. Egger M, Davey Smith G, Schneider M, Minder C. Bias in meta-analysis detected by a simple, graphical test. *Bmj*. 1997; 315(7109):629–34. PMID: [9310563](https://pubmed.ncbi.nlm.nih.gov/9310563/).
30. Begg CB, Mazumdar M. Operating characteristics of a rank correlation test for publication bias. *Biometrics*. 1994; 50(4):1088–101. PMID: [7786990](https://pubmed.ncbi.nlm.nih.gov/7786990/).
31. Greenland S, Longnecker MP. Methods for trend estimation from summarized dose-response data, with applications to meta-analysis. *American journal of epidemiology*. 1992; 135(11):1301–9. PMID: [1626547](https://pubmed.ncbi.nlm.nih.gov/1626547/).
32. Orsini N, Bellocco R, Greenland S. Generalized least squares for trend estimation of summarized dose-response data. *Stata J*. 2006; 6(1):40–57.



33. Li WQ, Park Y, Wu JW, Ren JS, Goldstein AM, Taylor PR, et al. Index-based dietary patterns and risk of esophageal and gastric cancer in a large cohort study. *Clinical gastroenterology and hepatology*. 2013; 11(9):1130–6 e2. doi: [10.1016/j.cgh.2013.03.023](https://doi.org/10.1016/j.cgh.2013.03.023) PMID: [23591281](https://pubmed.ncbi.nlm.nih.gov/23591281/).
34. Palli D, Bianchi S, Decarli A, Cipriani F, Avellini C, Cocco P, et al. A case-control study of cancers of the gastric cardia in Italy. *British journal of cancer*. 1992; 65(2):263–6. PMID: [1739627](https://pubmed.ncbi.nlm.nih.gov/1739627/).
35. Palli D, Russo A, Ottini L, Masala G, Saieva C, Amorosi A, et al. Red meat, family history, and increased risk of gastric cancer with microsatellite instability. *Cancer research*. 2001; 61(14):5415–9. PMID: [11454685](https://pubmed.ncbi.nlm.nih.gov/11454685/).
36. Buiatti E, Palli D, Bianchi S, Decarli A, Amadori D, Avellini C, et al. A case-control study of gastric cancer and diet in Italy. III. Risk patterns by histologic type. *International journal of cancer*. 1991; 48(3):369–74. PMID: [2040530](https://pubmed.ncbi.nlm.nih.gov/2040530/).
37. Palli D, Caporaso NE, Shiao YH, Saieva C, Amorosi A, Masala G, et al. Diet, *Helicobacter pylori*, and p53 mutations in gastric cancer: a molecular epidemiology study in Italy. *Cancer epidemiology, biomarkers & prevention*. 1997; 6(12):1065–9. PMID: [9419404](https://pubmed.ncbi.nlm.nih.gov/9419404/).
38. Buiatti E, Palli D, Decarli A, Amadori D, Avellini C, Bianchi S, et al. A case-control study of gastric cancer and diet in Italy. *International journal of cancer*. 1989; 44(4):611–6. PMID: [2793233](https://pubmed.ncbi.nlm.nih.gov/2793233/).
39. Brown LM, Swanson CA, Gridley G, Swanson GM, Schoenberg JB, Greenberg RS, et al. Adenocarcinoma of the esophagus: role of obesity and diet. *Journal of the National Cancer Institute*. 1995; 87(2):104–9. PMID: [7707381](https://pubmed.ncbi.nlm.nih.gov/7707381/).
40. Tuyns AJ, Kaaks R, Haelterman M, Riboli E. Diet and gastric cancer. A case-control study in Belgium. *International journal of cancer*. 1992; 51(1):1–6. PMID: [1563829](https://pubmed.ncbi.nlm.nih.gov/1563829/).
41. Kaaks R, Tuyns AJ, Haelterman M, Riboli E. Nutrient intake patterns and gastric cancer risk: a case-control study in Belgium. *International journal of cancer*. 1998; 78(4):415–20. PMID: [9797127](https://pubmed.ncbi.nlm.nih.gov/9797127/).
42. Gonzalez CA, Riboli E, Badosa J, Batiste E, Cardona T, Pita S, et al. Nutritional factors and gastric cancer in Spain. *American journal of epidemiology*. 1994; 139(5):466–73. PMID: [8154470](https://pubmed.ncbi.nlm.nih.gov/8154470/).
43. Gonzalez CA, Sanz JM, Marcos G, Pita S, Brullet E, Saigi E, et al. Dietary factors and stomach cancer in Spain: a multi-centre case-control study. *International journal of cancer*. 1991; 49(4):513–9. PMID: [1917151](https://pubmed.ncbi.nlm.nih.gov/1917151/).
44. Chen H, Tucker KL, Graubard BI, Heineman EF, Markin RS, Potischman NA, et al. Nutrient intakes and adenocarcinoma of the esophagus and distal stomach. *Nutrition and cancer*. 2002; 42(1):33–40. doi: [10.1207/S15327914NC421\\_5](https://doi.org/10.1207/S15327914NC421_5) PMID: [12235648](https://pubmed.ncbi.nlm.nih.gov/12235648/).
45. Wu AH, Tseng CC, Hankin J, Bernstein L. Fiber intake and risk of adenocarcinomas of the esophagus and stomach. *Cancer causes & control*. 2007; 18(7):713–22. doi: [10.1007/s10552-007-9014-8](https://doi.org/10.1007/s10552-007-9014-8) PMID: [17562192](https://pubmed.ncbi.nlm.nih.gov/17562192/).
46. Kim HJ, Kim MK, Chang WK, Choi HS, Choi BY, Lee SS. Effect of nutrient intake and *Helicobacter pylori* infection on gastric cancer in Korea: a case-control study. *Nutrition and cancer*. 2005; 52(2):138–46. doi: [10.1207/s15327914nc5202\\_4](https://doi.org/10.1207/s15327914nc5202_4) PMID: [16201845](https://pubmed.ncbi.nlm.nih.gov/16201845/).
47. Jedrychowski W, Popiela T, Steindorf K, Tobiasz-Adamczyk B, Kulig J, Penar A, et al. Nutrient intake patterns in gastric and colorectal cancers. *International journal of occupational medicine and environmental health*. 2001; 14(4):391–5. PMID: [11885923](https://pubmed.ncbi.nlm.nih.gov/11885923/).
48. Terry P, Lagergren J, Wolk A, Nyren O. Reflux-inducing dietary factors and risk of adenocarcinoma of the esophagus and gastric cardia. *Nutrition and cancer*. 2000; 38(2):186–91. doi: [10.1207/S15327914NC382\\_7](https://doi.org/10.1207/S15327914NC382_7) PMID: [11525596](https://pubmed.ncbi.nlm.nih.gov/11525596/).
49. Lopez-Carrillo L, Lopez-Cervantes M, Ward MH, Bravo-Alvarado J, Ramirez-Espitia A. Nutrient intake and gastric cancer in Mexico. *International journal of cancer*. 1999; 83(5):601–5. PMID: [10521793](https://pubmed.ncbi.nlm.nih.gov/10521793/).
50. Comtee J, Pobal D, Riboli E, Guyader M, Hemon B. A case-control study of gastric cancer and nutritional factors in Marseille, France. *European journal of epidemiology*. 1995; 11(1):55–65. PMID: [7489774](https://pubmed.ncbi.nlm.nih.gov/7489774/).
51. Hansson LE, Nyren O, Bergstrom R, Wolk A, Lindgren A, Baron J, et al. Nutrients and gastric cancer risk. A population-based case-control study in Sweden. *International journal of cancer*. 1994; 57(5):638–44. PMID: [8194870](https://pubmed.ncbi.nlm.nih.gov/8194870/).
52. Kabat GC, Ng SK, Wynder EL. Tobacco, alcohol intake, and diet in relation to adenocarcinoma of the esophagus and gastric cardia. *Cancer causes & control*. 1993; 4(2):123–32. PMID: [8481491](https://pubmed.ncbi.nlm.nih.gov/8481491/).
53. Buiatti E, Palli D, Decarli A, Amadori D, Avellini C, Bianchi S, et al. A case-control study of gastric cancer and diet in Italy: II. Association with nutrients. *International journal of cancer*. 1990; 45(5):896–901. PMID: [2335393](https://pubmed.ncbi.nlm.nih.gov/2335393/).
54. Risch HA, Jain M, Choi NW, Fodor JG, Pfeiffer CJ, Howe GR, et al. Dietary factors and the incidence of cancer of the stomach. *American journal of epidemiology*. 1985; 122(6):947–59. PMID: [2998182](https://pubmed.ncbi.nlm.nih.gov/2998182/).

55. Lucenteforte E, Bosetti C, Gallus S, Bertuccio P, Pelucchi C, Tavani A, et al. Macronutrients, fatty acids and cholesterol intake and stomach cancer risk. *Annals of oncology*. 2009; 20(8):1434–8. doi: [10.1093/annonc/mdp009](https://doi.org/10.1093/annonc/mdp009) PMID: [19465424](https://pubmed.ncbi.nlm.nih.gov/19465424/).
56. Harrison LE, Zhang ZF, Karpeh MS, Sun M, Kurtz RC. The role of dietary factors in the intestinal and diffuse histologic subtypes of gastric adenocarcinoma: a case-control study in the U.S. *Cancer*. 1997; 80(6):1021–8. PMID: [9305701](https://pubmed.ncbi.nlm.nih.gov/9305701/).
57. Munoz N, Plummer M, Vivas J, Moreno V, De Sanjose S, Lopez G, et al. A case-control study of gastric cancer in Venezuela. *International journal of cancer*. 2001; 93(3):417–23. PMID: [11433408](https://pubmed.ncbi.nlm.nih.gov/11433408/).
58. Palli D, Russo A, Decarli A. Dietary patterns, nutrient intake and gastric cancer in a high-risk area of Italy. *Cancer causes & control*. 2001; 12(2):163–72. PMID: [11246845](https://pubmed.ncbi.nlm.nih.gov/11246845/).
59. Qiu JL, Chen K, Zheng JN, Wang JY, Zhang LJ, Sui LM. Nutritional factors and gastric cancer in Zhou-shan Islands, China. *World journal of gastroenterology*. 2005; 11(28):4311–6. PMID: [16038026](https://pubmed.ncbi.nlm.nih.gov/16038026/).
60. Pakseresht M, Forman D, Malekzadeh R, Yazdanbod A, West RM, Greenwood DC, et al. Dietary habits and gastric cancer risk in north-west Iran. *Cancer causes & control*. 2011; 22(5):725–36. doi: [10.1007/s10552-011-9744-5](https://doi.org/10.1007/s10552-011-9744-5) PMID: [21347819](https://pubmed.ncbi.nlm.nih.gov/21347819/).
61. Kicinski M, Springate DA, Kontopantelis E. Publication bias in meta-analyses from the Cochrane Database of Systematic Reviews. *Statistics in Medicine*. 2011; 22(5):725–36.
62. Satia-Abouta J, Patterson RE, Neuhauser ML, Elder J. Dietary acculturation: applications to nutrition research and dietetics. *Journal of the American Dietetic Association*. 2002; 102(8):1105–18. PMID: [12171455](https://pubmed.ncbi.nlm.nih.gov/12171455/).
63. Rolland-Cachera MF, Bellisle F, Deheeger M. Nutritional status and food intake in adolescents living in Western Europe. *European journal of clinical nutrition*. 2000; 54 Suppl 1:S41–6. PMID: [10805037](https://pubmed.ncbi.nlm.nih.gov/10805037/).
64. Halkjaer J, Olsen A, Bjerregaard LJ, Deharveng G, Tjonneland A, Welch AA, et al. Intake of total, animal and plant proteins, and their food sources in 10 countries in the European Prospective Investigation into Cancer and Nutrition. *European journal of clinical nutrition*. 2009; 63 Suppl 4:S16–36. doi: [10.1038/ejcn.2009.73](https://doi.org/10.1038/ejcn.2009.73) PMID: [19888272](https://pubmed.ncbi.nlm.nih.gov/19888272/).
65. Welch AA, Lund E, Amiano P, Dorronsoro M, Brustad M, Kumle M, et al. Variability of fish consumption within the 10 European countries participating in the European Investigation into Cancer and Nutrition (EPIC) study. *Public health nutrition*. 2002; 5(6B):1273–85. doi: [10.1079/PHN2002404](https://doi.org/10.1079/PHN2002404) PMID: [12639232](https://pubmed.ncbi.nlm.nih.gov/12639232/).
66. Tsubura A, Yuri T, Yoshizawa K, Uehara N, Takada H. Role of fatty acids in malignancy and visual impairment: epidemiological evidence and experimental studies. *Histology and histopathology*. 2009; 24(2):223–34. PMID: [19085838](https://pubmed.ncbi.nlm.nih.gov/19085838/).
67. Gonzalez CA. The European Prospective Investigation into Cancer and Nutrition (EPIC). *Public health nutrition*. 2006; 9(1A):124–6. PMID: [16512959](https://pubmed.ncbi.nlm.nih.gov/16512959/).
68. Turner LB. A meta-analysis of fat intake, reproduction, and breast cancer risk: an evolutionary perspective. *American journal of human biology*. 2011; 23(5):601–8. doi: [10.1002/ajhb.21176](https://doi.org/10.1002/ajhb.21176) PMID: [21681848](https://pubmed.ncbi.nlm.nih.gov/21681848/).
69. Kuriki K, Hirose K, Matsuo K, Wakai K, Ito H, Kanemitsu Y, et al. Meat, milk, saturated fatty acids, the Pro12Ala and C161T polymorphisms of the PPARgamma gene and colorectal cancer risk in Japanese. *Cancer science*. 2006; 97(11):1226–35. doi: [10.1111/j.1349-7006.2006.00314.x](https://doi.org/10.1111/j.1349-7006.2006.00314.x) PMID: [16965392](https://pubmed.ncbi.nlm.nih.gov/16965392/).
70. Terry P, Bergkvist L, Holmberg L, Wolk A. No association between fat and fatty acids intake and risk of colorectal cancer. *Cancer epidemiology, biomarkers & prevention*. 2001; 10(8):913–4. PMID: [11489762](https://pubmed.ncbi.nlm.nih.gov/11489762/).
71. Escrich E, Moral R, Grau L, Costa I, Solanas M. Molecular mechanisms of the effects of olive oil and other dietary lipids on cancer. *Molecular nutrition & food research*. 2007; 51(10):1279–92. doi: [10.1002/mnfr.200700213](https://doi.org/10.1002/mnfr.200700213) PMID: [17879998](https://pubmed.ncbi.nlm.nih.gov/17879998/).
72. Tran GD, Sun XD, Abnet CC, Fan JH, Dawsey SM, Dong ZW, et al. Prospective study of risk factors for esophageal and gastric cancers in the Linxian general population trial cohort in China. *International journal of cancer*. 2005; 113(3):456–63. doi: [10.1002/ijc.20616](https://doi.org/10.1002/ijc.20616) PMID: [15455378](https://pubmed.ncbi.nlm.nih.gov/15455378/).
73. Gao Y, Hu N, Han XY, Ding T, Giffen C, Goldstein AM, et al. Risk factors for esophageal and gastric cancers in Shanxi Province, China: a case-control study. *Cancer epidemiology*. 2011; 35(6):e91–9. doi: [10.1016/j.canep.2011.06.006](https://doi.org/10.1016/j.canep.2011.06.006) PMID: [21846596](https://pubmed.ncbi.nlm.nih.gov/21846596/).
74. Nourai M, Pietinen P, Kamangar F, Dawsey SM, Abnet CC, Albanes D, et al. Fruits, vegetables, and antioxidants and risk of gastric cancer among male smokers. *Cancer epidemiology, biomarkers & prevention*. 2005; 14(9):2087–92. doi: [10.1158/1055-9965.EPI-05-0038](https://doi.org/10.1158/1055-9965.EPI-05-0038) PMID: [16172214](https://pubmed.ncbi.nlm.nih.gov/16172214/).
75. de Martel C, Forman D, Plummer M. Gastric cancer: epidemiology and risk factors. *Gastroenterology clinics of North America*. 2013; 42(2):219–40. doi: [10.1016/j.gtc.2013.01.003](https://doi.org/10.1016/j.gtc.2013.01.003) PMID: [23639638](https://pubmed.ncbi.nlm.nih.gov/23639638/).

76. Lawrence GD. Dietary fats and health: dietary recommendations in the context of scientific evidence. *Advances in nutrition*. 2013; 4(3):294–302. doi: [10.3945/an.113.003657](https://doi.org/10.3945/an.113.003657) PMID: [23674795](https://pubmed.ncbi.nlm.nih.gov/23674795/).
77. Trichopoulou A, Lagiou P, Kuper H, Trichopoulos D. Cancer and Mediterranean dietary traditions. *Cancer epidemiology, biomarkers & prevention*. 2000; 9(9):869–73. PMID: [11008902](https://pubmed.ncbi.nlm.nih.gov/11008902/).
78. Buckland G, Agudo A, Lujan L, Jakszyn P, Bueno-de-Mesquita HB, Palli D, et al. Adherence to a Mediterranean diet and risk of gastric adenocarcinoma within the European Prospective Investigation into Cancer and Nutrition (EPIC) cohort study. *The American journal of clinical nutrition*. 2010; 91(2):381–90. doi: [10.3945/ajcn.2009.28209](https://doi.org/10.3945/ajcn.2009.28209) PMID: [20007304](https://pubmed.ncbi.nlm.nih.gov/20007304/).
79. Fung TT, Hu FB, McCullough ML, Newby PK, Willett WC, Holmes MD. Diet quality is associated with the risk of estrogen receptor-negative breast cancer in postmenopausal women. *The Journal of nutrition*. 2006; 136(2):466–72. PMID: [16424129](https://pubmed.ncbi.nlm.nih.gov/16424129/).
80. Reedy J, Mitrou PN, Krebs-Smith SM, Wirfalt E, Flood A, Kipnis V, et al. Index-based dietary patterns and risk of colorectal cancer: the NIH-AARP Diet and Health Study. *American journal of epidemiology*. 2008; 168(1):38–48. doi: [10.1093/aje/kwn097](https://doi.org/10.1093/aje/kwn097) PMID: [18525082](https://pubmed.ncbi.nlm.nih.gov/18525082/).
81. Hanf V, Gonder U. Nutrition and primary prevention of breast cancer: foods, nutrients and breast cancer risk. *European journal of obstetrics, gynecology, and reproductive biology*. 2005; 123(2):139–49. doi: [10.1016/j.ejogrb.2005.05.011](https://doi.org/10.1016/j.ejogrb.2005.05.011) PMID: [16316809](https://pubmed.ncbi.nlm.nih.gov/16316809/).
82. Kitts DD. Bioactive substances in food: identification and potential uses. *Canadian journal of physiology and pharmacology*. 1994; 72(4):423–34. PMID: [7922875](https://pubmed.ncbi.nlm.nih.gov/7922875/).
83. Hashim YZ, Eng M, Gill CI, McGlynn H, Rowland IR. Components of olive oil and chemoprevention of colorectal cancer. *Nutrition reviews*. 2005; 63(11):374–86. PMID: [16370222](https://pubmed.ncbi.nlm.nih.gov/16370222/).
84. MacLean CH, Newberry SJ, Mojica WA, Khanna P, Issa AM, Suttorp MJ, et al. Effects of omega-3 fatty acids on cancer risk: a systematic review. *Jama*. 2006; 295(4):403–15. doi: [10.1001/jama.295.4.403](https://doi.org/10.1001/jama.295.4.403) PMID: [16434631](https://pubmed.ncbi.nlm.nih.gov/16434631/).
85. Toit-Kohn JL, Louw L, Engelbrecht AM. Docosahexaenoic acid induces apoptosis in colorectal carcinoma cells by modulating the PI3 kinase and p38 MAPK pathways. *The Journal of nutritional biochemistry*. 2009; 20(2):106–14. doi: [10.1016/j.jnutbio.2007.12.005](https://doi.org/10.1016/j.jnutbio.2007.12.005) PMID: [18479896](https://pubmed.ncbi.nlm.nih.gov/18479896/).
86. Corsetto PA, Montorfano G, Zava S, Jovenitti IE, Cremona A, Berra B, et al. Effects of n-3 PUFAs on breast cancer cells through their incorporation in plasma membrane. *Lipids in health and disease*. 2011; 10:73. doi: [10.1186/1476-511X-10-73](https://doi.org/10.1186/1476-511X-10-73) PMID: [21569413](https://pubmed.ncbi.nlm.nih.gov/21569413/).
87. Song KS, Jing K, Kim JS, Yun EJ, Shin S, Seo KS, et al. Omega-3-polyunsaturated fatty acids suppress pancreatic cancer cell growth in vitro and in vivo via downregulation of Wnt/Beta-catenin signaling. *Pancreatology*. 2011; 11(6):574–84. doi: [10.1159/000334468](https://doi.org/10.1159/000334468) PMID: [22213040](https://pubmed.ncbi.nlm.nih.gov/22213040/).
88. Akinsete JA, Ion G, Witte TR, Hardman WE. Consumption of high omega-3 fatty acid diet suppressed prostate tumorigenesis in C3(1) Tag mice. *Carcinogenesis*. 2012; 33(1):140–8. doi: [10.1093/carcin/bgr238](https://doi.org/10.1093/carcin/bgr238) PMID: [22045025](https://pubmed.ncbi.nlm.nih.gov/22045025/).
89. Sheng H, Li P, Chen X, Liu B, Zhu Z, Cao W. Omega-3 PUFAs induce apoptosis of gastric cancer cells via ADORA1. *Frontiers in bioscience*. 2014; 19:854–61. PMID: [24896321](https://pubmed.ncbi.nlm.nih.gov/24896321/).
90. Wei Z, Wang W, Chen J, Yang D, Yan R, Cai Q. A prospective, randomized, controlled study of omega-3 fish oil fat emulsion-based parenteral nutrition for patients following surgical resection of gastric tumors. *Nutrition journal*. 2014; 13:25. doi: [10.1186/1475-2891-13-25](https://doi.org/10.1186/1475-2891-13-25) PMID: [24655407](https://pubmed.ncbi.nlm.nih.gov/24655407/).
91. Kontopantelis E, Springate DA, Reeves D. A re-analysis of the Cochrane Library data: the dangers of unobserved heterogeneity in meta-analyses. *PLoS One*. 2013; 8(7):e69930. doi: [10.1371/journal.pone.0069930](https://doi.org/10.1371/journal.pone.0069930) PMID: [23922860](https://pubmed.ncbi.nlm.nih.gov/23922860/).
92. Aune D, Chan DS, Lau R, Vieira R, Greenwood DC, Kampman E, et al. Dietary fibre, whole grains, and risk of colorectal cancer: systematic review and dose-response meta-analysis of prospective studies. *Bmj*. 2011; 343:d6617. doi: [10.1136/bmj.d6617](https://doi.org/10.1136/bmj.d6617) PMID: [22074852](https://pubmed.ncbi.nlm.nih.gov/22074852/).
93. Davies HT, Crombie IK, Tavakoli M. When can odds ratios mislead?. *Bmj*. 1998; 316(7136):989–91. doi: [10.1136/bmj.316.7136.989](https://doi.org/10.1136/bmj.316.7136.989) PMID: [9550961](https://pubmed.ncbi.nlm.nih.gov/9550961/).
